# Supplementary material for: The Starvation Symptom Inventory: Development and Psychometric Properties
Source: MDPI journal article supplement (doi:10.3390/nu9090967), 2017-09-01
Supplement: s1 [file s1]

**Supplementary Table S1.** 16-Item Starvation Symptom Inventory: means (standard deviations), eigenvalues, percentages of variance, factor loadings, and item-total correlations in the anorexia nervosa sample.

|                                                         | <b>Mean<br/>(SD)*</b> | <b>Eigenvalue</b> | <b>%<br/>variance</b> | <b>Factor</b> | <b>Item-<br/>total</b> |
|---------------------------------------------------------|-----------------------|-------------------|-----------------------|---------------|------------------------|
| 1. Worried about food?                                  | 5.3 (1.6)             | 6.96              | 43.5                  | 0.603         | 0.54                   |
| 2. Collected recipes, menus or cookbooks?               | 1.5 (2.0)             | 1.25              | 7.8                   | 0.421         | 0.37                   |
| 3. Increased your consumption of tea, coffee or spices? | 2.6 (2.6)             | 1.01              | 6.9                   | 0.551         | 0.51                   |
| 4. Felt depressed?                                      | 3.8 (2.0)             | 0.95              | 5.9                   | 0.813         | 0.74                   |
| 5. Felt anxious?                                        | 4.4 (1.9)             | 0.86              | 5.4                   | 0.795         | 0.72                   |
| 6. Felt irritable?                                      | 4.2 (1.9)             | 0.79              | 4.9                   | 0.753         | 0.68                   |
| 7. Had mood swings (between excited and depressed)?     | 4.3(1.9)              | 0.64              | 4.0                   | 0.763         | 0.70                   |
| 8. Stayed away from other people?                       | 3.7 (2.1)             | 0.61              | 3.8                   | 0.784         | 0.72                   |
| 9. Experienced a loss of concentration?                 | 3.5 (2.2)             | 0.58              | 3.6                   | 0.705         | 0.65                   |
| 10. Felt apathetic?                                     | 3.2 (2.2)             | 0.51              | 3.2                   | 0.808         | 0.75                   |
| 11. Had disturbed sleep?                                | 3.4 (2.2)             | 0.42              | 2.6                   | 0.632         | 0.57                   |
| 12. Felt weak?                                          | 3.6 (2.1)             | 0.36              | 2.2                   | 0.675         | 0.63                   |
| 13. Experienced a lack of interest in sex?              | 4.2 (2.2)             | 0.33              | 2.1                   | 0.657         | 0.59                   |
| 14. Felt cold?                                          | 4.2 (2.0)             | 0.25              | 1.5                   | 0.577         | 0.53                   |
| 15. Felt an increase in hunger? &                       | 1.6 (1.8)             | 0.23              | 1.4                   | 0.160         | 0.13                   |
| 16. Felt full early?                                    | 3.7 (2.3)             | 0.14              | 0.9                   | 0.520         | 0.45                   |

\* Measured on a Likert-type scale scored from 0–6. & Removed due to factor loading <0.40

**Supplementary Table S2: Starvation Symptom Inventory (SSI)**

| STARVATION SYMPTOM INVENTORY<br>SSI                                                                                                                                  |       | SURNAME: .....<br>NAME: .....<br>DATE: ..... |           |            |            |            |           |  |
|----------------------------------------------------------------------------------------------------------------------------------------------------------------------|-------|----------------------------------------------|-----------|------------|------------|------------|-----------|--|
| INSTRUCTIONS: The following questions are about the past four weeks ( <u>28 days</u> ). Please read each question carefully and respond to ALL questions. Thank you. |       |                                              |           |            |            |            |           |  |
| How many times in the last 28 days have you:                                                                                                                         | Never | 1-5 days                                     | 6-12 days | 13-15 days | 16-22 days | 23-27 days | Every day |  |
| Worried about food?                                                                                                                                                  |       |                                              |           |            |            |            |           |  |
| Collected recipes, menus or cookbooks?                                                                                                                               |       |                                              |           |            |            |            |           |  |
| Increased your consumption of tea, coffee or spices?                                                                                                                 |       |                                              |           |            |            |            |           |  |
| Felt depressed?                                                                                                                                                      |       |                                              |           |            |            |            |           |  |
| Felt anxious?                                                                                                                                                        |       |                                              |           |            |            |            |           |  |
| Felt irritable?                                                                                                                                                      |       |                                              |           |            |            |            |           |  |
| Had mood swings (between excited and depressed)?                                                                                                                     |       |                                              |           |            |            |            |           |  |
| Stayed away from other people?                                                                                                                                       |       |                                              |           |            |            |            |           |  |
| Experienced a loss of concentration?                                                                                                                                 |       |                                              |           |            |            |            |           |  |
| Felt apathetic?                                                                                                                                                      |       |                                              |           |            |            |            |           |  |
| Had disturbed sleep?                                                                                                                                                 |       |                                              |           |            |            |            |           |  |
| Felt weak?                                                                                                                                                           |       |                                              |           |            |            |            |           |  |
| Experienced a lack of interest in sex?                                                                                                                               |       |                                              |           |            |            |            |           |  |
| Felt cold?                                                                                                                                                           |       |                                              |           |            |            |            |           |  |
| Felt full early?                                                                                                                                                     |       |                                              |           |            |            |            |           |  |
